# Supplementary material for: Photochromic behavior of diarylbenzene nanoparticles prepared by top-down and bottom-up approaches
Source: Royal Society of Chemistry journal article supplement (doi:10.1039/d1ma00972a), 2021-12-14
Supplement: d1ma00972a1.pdf [file d1ma00972a1.pdf]

Supporting Information for

# Photochromic behavior of diarylbenzene nanoparticles prepared by top-down and bottom- up approaches

*Shota Hamatani, Daichi Kitagawa,\* Rikuto Maegawa, and Seiya Kobatake\**

\*E-mail: [kitagawa@osaka-cu.ac.jp](mailto:kitagawa@osaka-cu.ac.jp); [kobatake@a-chem.eng.osaka-cu.ac.jp](mailto:kobatake@a-chem.eng.osaka-cu.ac.jp)

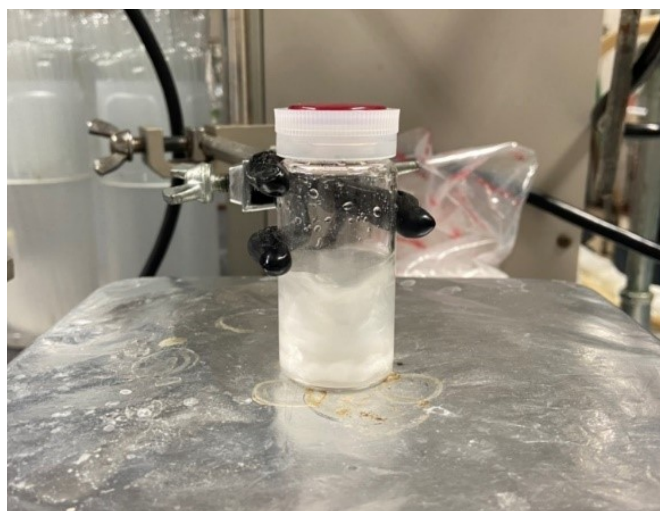

**Fig. S1** The photograph of a convenient ball-milling method used in this work.

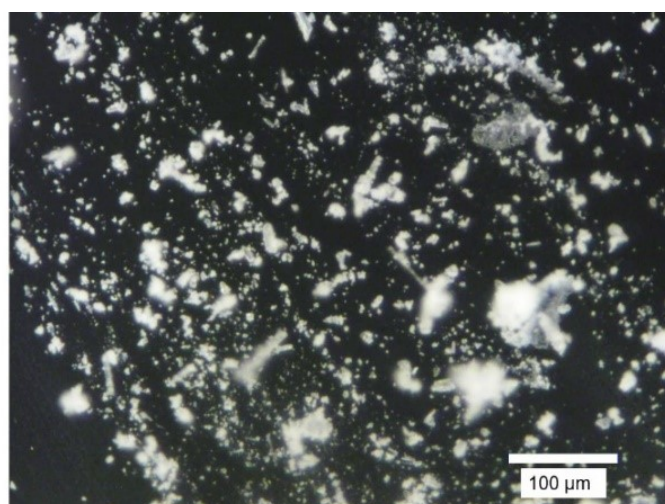

**Fig. S2** The optical microphotograph of powder crystals of **1a**.

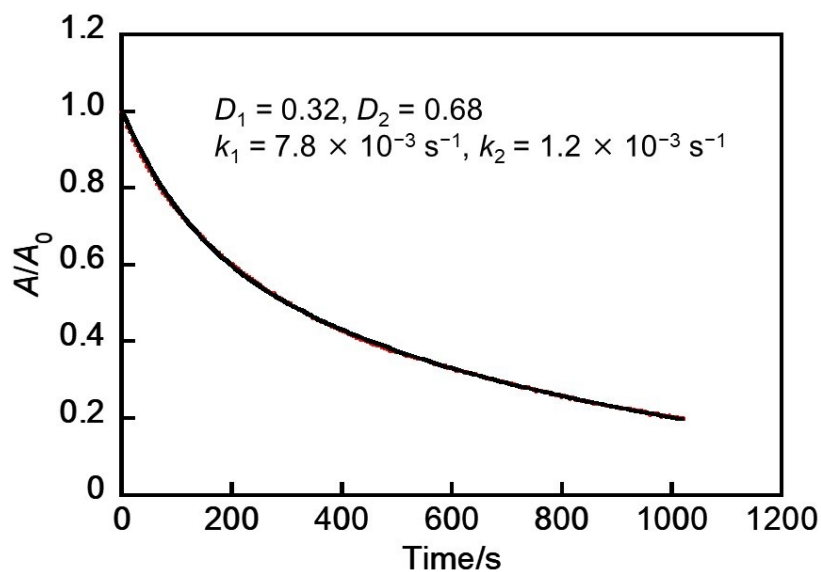

**Fig. S3** Absorption decay curves at  $\lambda_{\text{max}}$  for PIBMA film at 298 K. Red plots indicate experimental values. Black solid lines indicate the theoretical curves of the fitting using the biexponential equation.

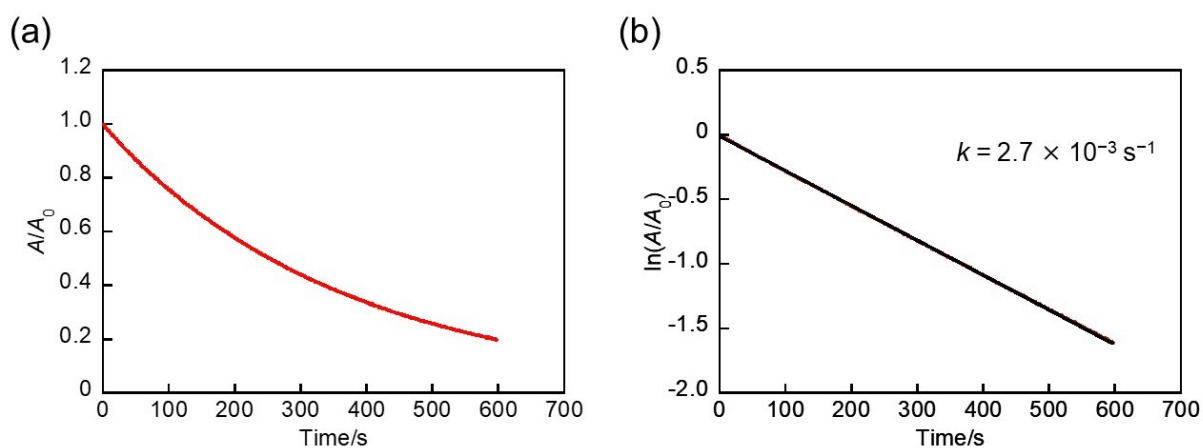

**Fig. S4** (a) Absorption decay curve and (b) first-order kinetic profile at  $\lambda_{\text{max}}$  for PBA film at 298 K.

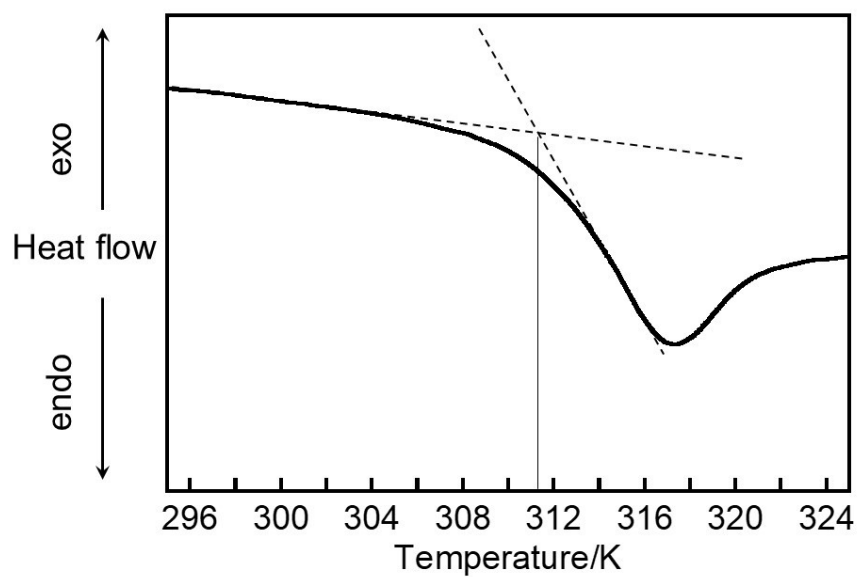

**Fig. S5** DSC trace of the amorphous solid of **1a** at a heating rate of  $5\text{ °C min}^{-1}$ .

**Caption of Videos.**

**Video S1.** Photochromic behavior of **NP-ball**.

**Video S2.** Photochromic behavior of **NP-rep**.
